# Supplementary material for: CircRNA hsa_circRNA_104348 promotes hepatocellular carcinoma progression through modulating miR-187-3p/RTKN2 axis and activating Wnt/β-catenin pathway
Source: PubMed Central journal article supplement (PMC7734058; doi:10.1038/s41419-020-03276-1), 2020-12-14

## 细胞遗传质量鉴定检验报告

检品名称：细胞系

检验类型：STR 基因型检验

样品编号：

表 1 样本编号

| 客户样本编号 | 公司编号        |
|--------|-------------|
| 211    | 20190315-37 |

样品数量：1

样品性状：细胞系

检测项目：STR

检测方法：用 Axygen 的基因组抽提试剂盒提取 DNA，采用 20- STR 扩增方案扩增，在 ABI 3730XL 型遗传分析仪上对 STR 位点和性别基因 Amelogenin 进行检测。

检验结果：

## (一) 检验基本情况

表 2：样本基因型检验结果

| 9           | 多等位基因 | 匹配细胞系             | 细胞库  | EV 值 | 匹配说明 |
|-------------|-------|-------------------|------|------|------|
| 20190315-37 | 无     | hep3b2.1-7(hep3b) | ATCC | 1    | 完全匹配 |

- 多等位基因指三等位及以上基因现象。
- 本次检测各细胞分型结果良好。

## (二)各样本描述

- 20190315-37: 该株细胞 DNA 分型在细胞系检索中找到完全匹配的细胞系, ATCC数据库显示细胞名为 HEP3B2.1-7(HEP3B), 细胞号对应 HB-8064, 本次检测在该细胞系中没有发现多等位基因。

## (三)样本分型结果

表 3: 细胞 20190315-37 的 STR 位点和 Amelogenin 位点的基因分型结果

| Marker  | 样本      |         |         |         | 细胞库信息   |         |         |
|---------|---------|---------|---------|---------|---------|---------|---------|
|         | Allele1 | Allele2 | Allele3 | Allele4 | Allele1 | Allele2 | Allele3 |
| D5S818  | 13      | 13      |         |         | 13      | 13      |         |
| D13S317 | 12      | 14      |         |         | 12      | 14      |         |
| D7S820  | 8       | 10      |         |         | 8       | 10      |         |
| D16S539 | 10      | 10      |         |         | 10      | 10      |         |
| VWA     | 17      | 17      |         |         | 17      | 17      |         |
| TH01    | 6       | 7       |         |         | 6       | 7       |         |
| AMEL    | X       | X       |         |         | X       | X       |         |
| TPOX    | 9       | 9       |         |         | 9       | 9       |         |
| CSF1PO  | 8       | 8       |         |         | 8       | 8       |         |
| D12S391 | 17      | 17      |         |         |         |         |         |
| FGA     | 18      | 18      |         |         |         |         |         |
| D2S1338 | 21      | 25      |         |         |         |         |         |
| D21S11  | 30      | 31      |         |         |         |         |         |
| D18S51  | 20      | 20      |         |         |         |         |         |
| D8S1179 | 12      | 12      |         |         |         |         |         |
| D3S1358 | 15      | 15      |         |         |         |         |         |
| D6S1043 | 12      | 17      |         |         |         |         |         |
| PENTAE  | 5       | 16      |         |         |         |         |         |
| D19S433 | 12.2    | 14      |         |         |         |         |         |
| PENTAD  | 12      | 14      |         |         |         |         |         |

其他说明:

(一)分型方案及位点分布:

附表: 实验方案及位点

|   | 方案 1        | 方案 2    | 方案 3        | 方案 4    |
|---|-------------|---------|-------------|---------|
| 1 | TH01        | TPOX    | D3S135<br>8 | AMEL    |
| 2 | D12S39<br>1 | VWA     | D13S31<br>7 | D5S818  |
| 3 | D7S820      | D8S1179 | D6S104<br>3 | D2S1338 |
| 4 | CSF1PO      | PENTAD  | D16S53<br>9 | D21S11  |
| 5 | FGA         |         | D19S43<br>3 | D18S51  |
| 6 | PENTAE      |         |             |         |

---

---

# Certificate of STR Analysis

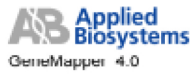

CellLineAuthentication-11

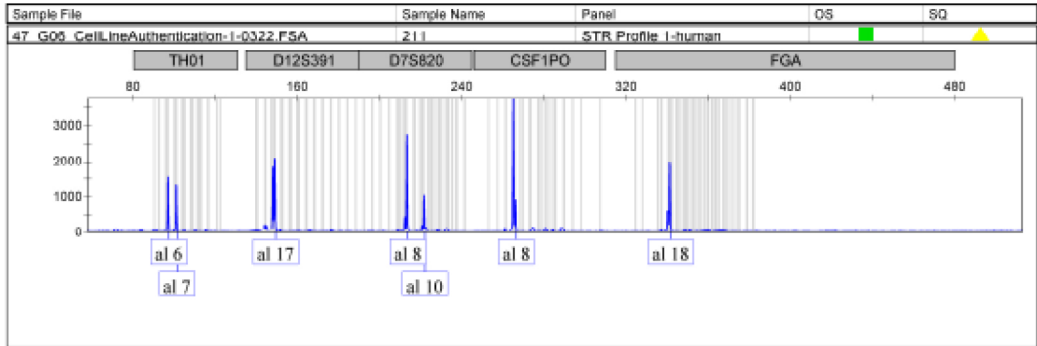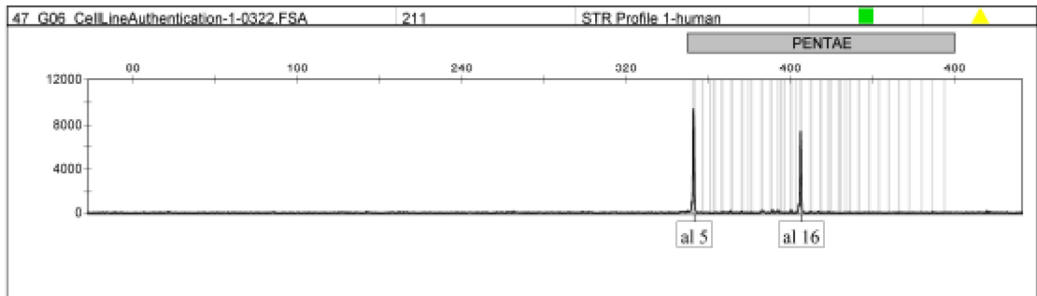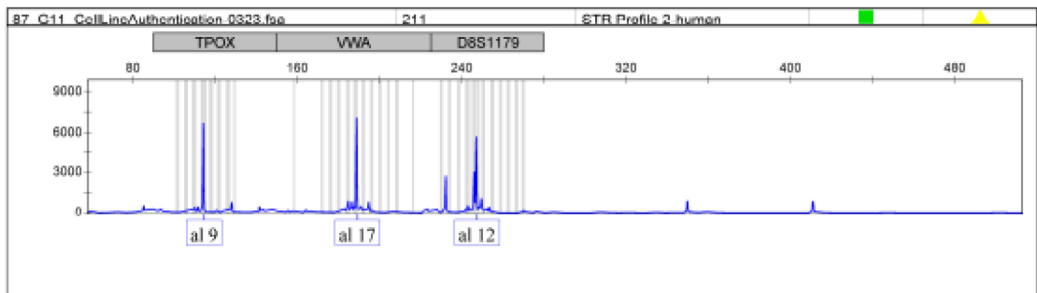



# Certificate of STR Analysis

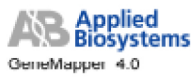

CellLineAuthentication-11

| Sample File                            | Sample Name | Panel               | OS | SQ |
|----------------------------------------|-------------|---------------------|----|----|
| 87_G11_CellLineAuthentication-0323.fsa | 211         | STR Profile 2-human | ■  | ▲  |

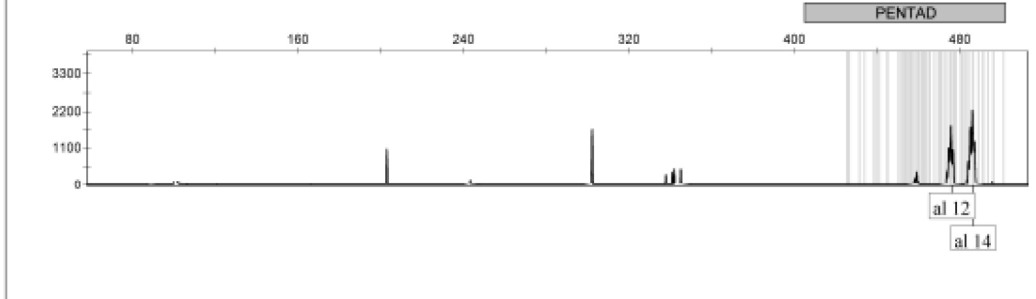

| Sample File                            | Sample Name | Panel               | OS | SQ |
|----------------------------------------|-------------|---------------------|----|----|
| 63_G08_CellLineAuthentication-0323.fsa | 211         | STR Profile 3-human | ■  | ▲  |

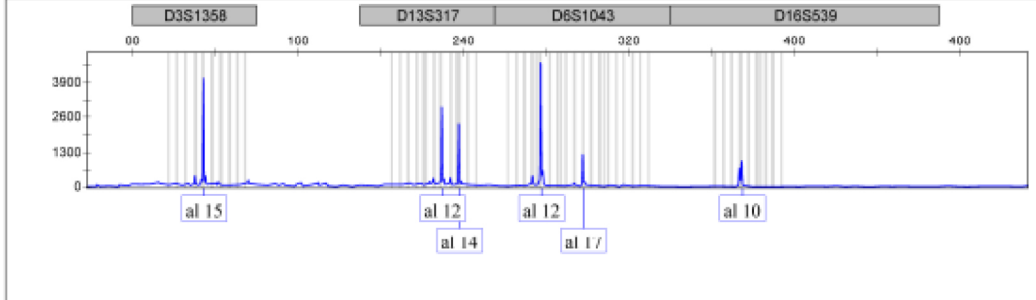

| Sample File                            | Sample Name | Panel               | OS | SQ |
|----------------------------------------|-------------|---------------------|----|----|
| 63_G08_CellLineAuthentication-0323.fsa | 211         | STR Profile 3-human | ■  | ▲  |

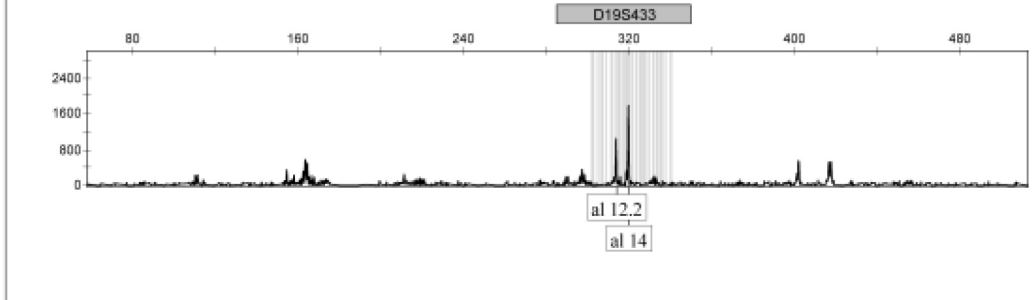

# Certificate of STR Analysis

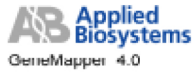

CellLineAuthentication-11

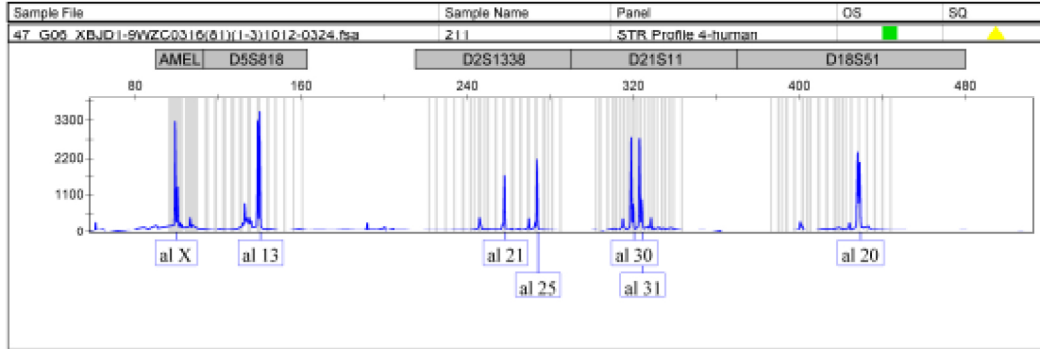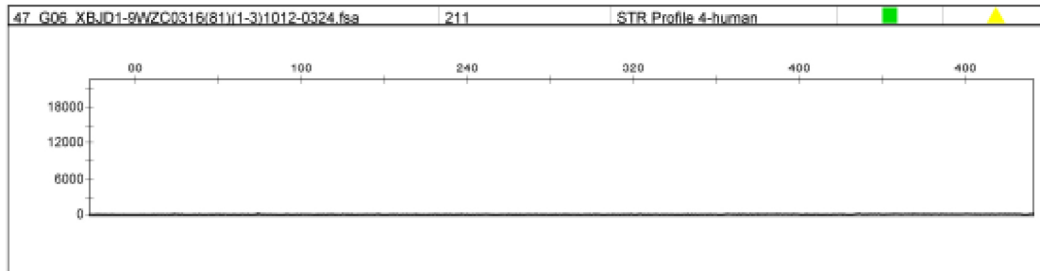

Supplement: 41419_2020_3276_MOESM3_ESM.pdf [file 41419_2020_3276_MOESM3_ESM.pdf]
